# Supplementary material for: Synthesis of highly refractive poly(phenylene thioether)s containing a binaphthyl or diphenylfluorene unit
Source: Royal Society of Chemistry journal article supplement (doi:10.1039/c2py20325a), 2012-01-01
Supplement: c2py20325a.pdf [file c2py20325a.pdf]

## Supporting Information

# Synthesis of Highly Refractive Poly(phenylene thioether)s Containing Binaphthyl or Diphenylfluorene Unit

*Yu Nakagawa, Yasuo Suzuki, Tomoya Higashihara, Shinji Ando, and Mitsuru Ueda\**

Department of Organic and Polymeric Materials, Graduate School of Science and Engineering, Tokyo

Institute of Technology, 2-12-1, O-okayama, Meguro-ku, Tokyo, 152-8552, Japan

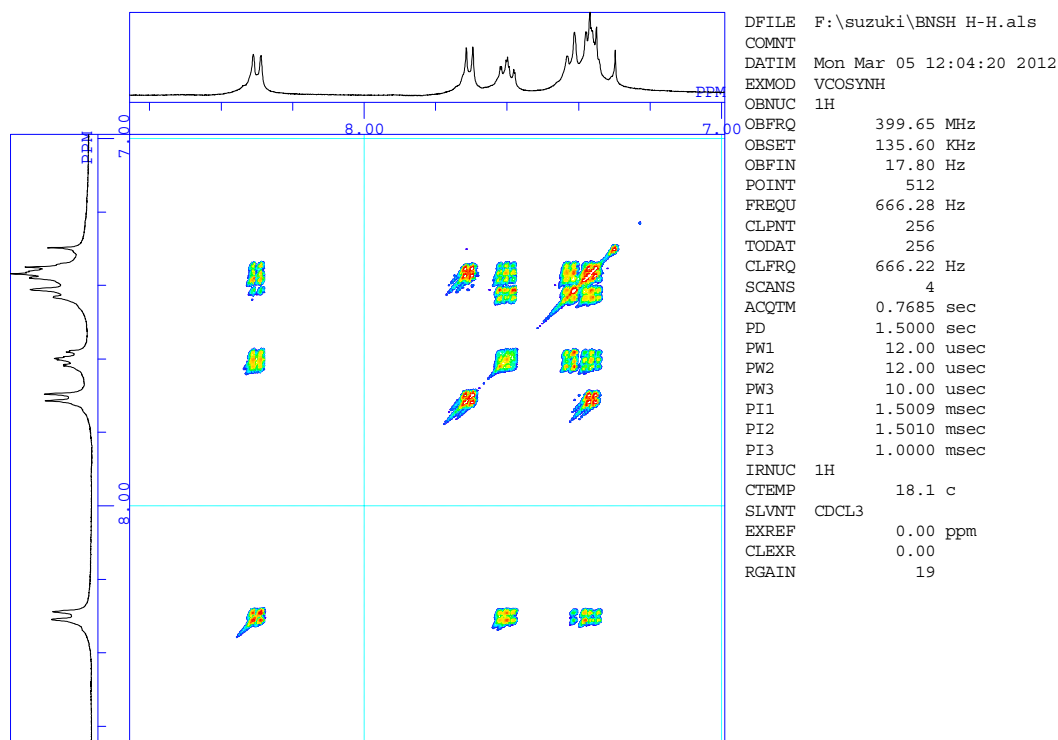

Figure S1.  $^1\text{H}$  COSY spectrum of **3**

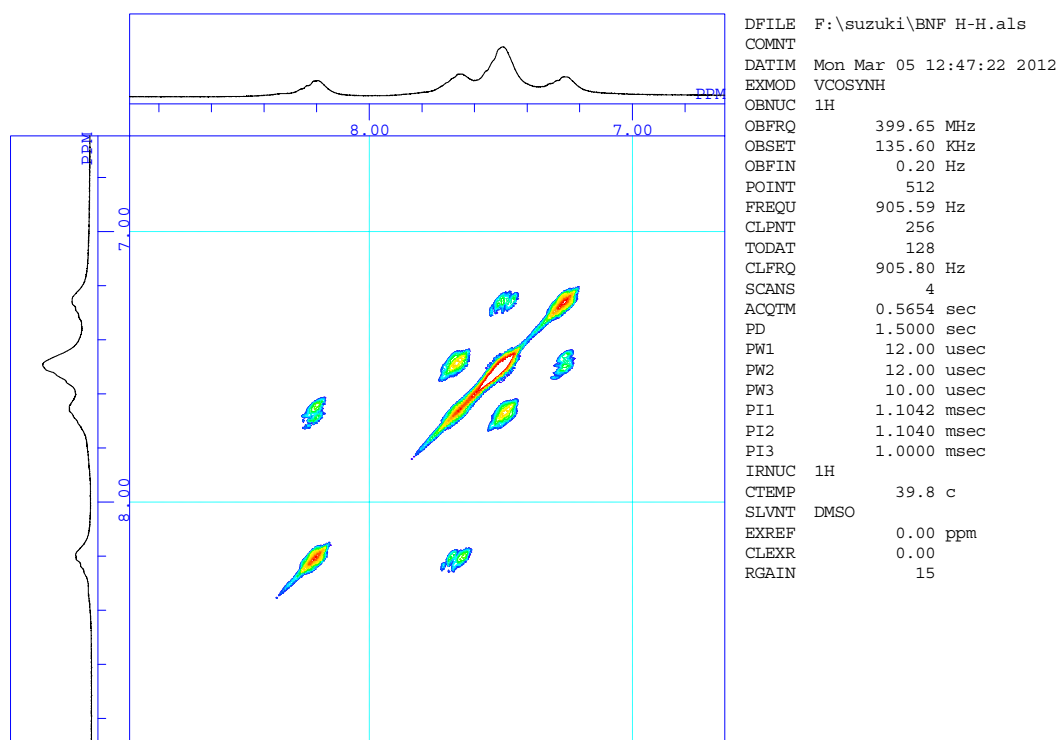

Figure S2.  $^1\text{H}$  COSY spectrum of **6**
